# Supplementary material for: Basic Amino Acid Residues of Human Eosinophil Derived Neurotoxin Essential for Glycosaminoglycan Binding
Source: MDPI journal article supplement (doi:10.3390/ijms140919067), 2013-09-16
Supplement: s1 [file s1]

# Supplementary Information

**Table S1.** Predicted interaction between wild type EDN and heparin hexasaccharide

| Residue            | Atom/group                                                 | Type of interaction | Residue | Atom/group                                                 |
|--------------------|------------------------------------------------------------|---------------------|---------|------------------------------------------------------------|
| Lys <sup>1</sup>   | $\alpha$ -NH <sub>3</sub> <sup>+</sup>                     | H-bond/Ionic        | IDS6    | Oxygen of 2- <i>O</i> -sulfate                             |
| Trp <sup>7</sup>   | C-4                                                        | vDW                 | SGN5    | Oxygen of <i>N</i> -sulfate                                |
|                    | C-5                                                        | vDW                 | SGN5    | C-1                                                        |
| Trp <sup>10</sup>  | N-1                                                        | H-bond              | SGN5    | Oxygen of 3-OH                                             |
| Gln <sup>14</sup>  | Amide NH <sub>2</sub>                                      | vDW                 | IDS4    | Oxygen of 2- <i>O</i> -sulfate                             |
|                    | Amide NH <sub>2</sub>                                      | vDW                 | SGN5    | Nitrogen, hydrogen, and oxygen of <i>N</i> -sulfonyl group |
| His <sup>15</sup>  | Hydrogen of $\tau$ -nitrogen                               | H-bond              | SGN5    | Oxygen of <i>N</i> -sulfonyl group                         |
|                    | C-2                                                        | vDW                 | IDS4    | Oxygen of 2- <i>O</i> -sulfate                             |
| Gln <sup>34</sup>  | Carbon of side-chain amide group                           | vDW                 | IDS6    | Ring oxygen                                                |
| Arg <sup>36</sup>  | $\delta$ - and $\omega$ -Nitrogen                          | H-bond/Ionic        | IDS6    | Oxygen of C-6 carboxyl group                               |
|                    | $\omega$ -Nitrogen                                         | Ionic               | SGN1    | Oxygen of <i>N</i> -Sulfonyl group                         |
|                    | C-5                                                        | vDW                 | SGN1    | Oxygen of <i>N</i> -Sulfonyl group                         |
| Lys <sup>38</sup>  | $\epsilon$ -NH <sub>3</sub> <sup>+</sup> group             | Ionic               | SGN1    | Oxygen of <i>N</i> -Sulfonyl group                         |
|                    | Hydrogen of $\epsilon$ -NH <sub>3</sub> <sup>+</sup> group | vDW                 | SGN1    | Oxygen of C3-OH group                                      |
| Asn <sup>39</sup>  | Hydrogen of side-chain amide group                         | vDW                 | SGN1    | Oxygen of sulfonyl group                                   |
| Gln <sup>40</sup>  | C-3                                                        | vDW                 | IDS2    | C-1                                                        |
|                    | C-4                                                        | vDW                 | IDS2    | C-1 and oxygen of 2- <i>O</i> -sulfonyl group              |
|                    | Nitrogen of side-chain amide group                         | vDW                 | IDS2    | C-1, C-5, and C-6                                          |
|                    | Nitrogen of side-chain amide group                         | H-bond              | IDS2    | Ring oxygen                                                |
| His <sup>129</sup> | C-5                                                        | vDW                 | IDS4    | C-4                                                        |
|                    | C-5                                                        | vDW                 | SGN5    | C-1                                                        |
| Leu <sup>130</sup> | C-1                                                        | vDW                 | IDS4    | Hydrogen of C-3-OH                                         |
|                    | Backbone carbonyl oxygen                                   | H-bond              | IDS4    | C-3-OH                                                     |
| Arg <sup>132</sup> | $\omega$ -Nitrogen                                         | Ionic               | SGN3    | <i>N</i> -sulfate                                          |
|                    | $\omega$ -Nitrogen                                         | Ionic               | IDS2    | 2- <i>O</i> -sulfate                                       |

H-bond, hydrogen bond; vDW, van der Waals force; SGN, 6-*O*-sulfated, *N*-sulfated glucosamine; IDS, 2-*O*-sulfated iduronic acid.

**Figure S1.** Binding activity of recombinant EDN-6His to low molecular weight heparin (LMWH). FACE was carried out by incubating 2-aminoacridone (AMAC)-labeled LMWH (0.33 nmol) with or without increasing concentrations of proteins in PBS at 25 °C for 15 min, and the reaction products were separated on a 1% agarose gel. The reacted probe and protein were shown above the gel, and the numbers below the gel indicated the relative intensity (%) of free probe and the molar ratio of protein to LMWH. FP, free probe; BP, bound probe.

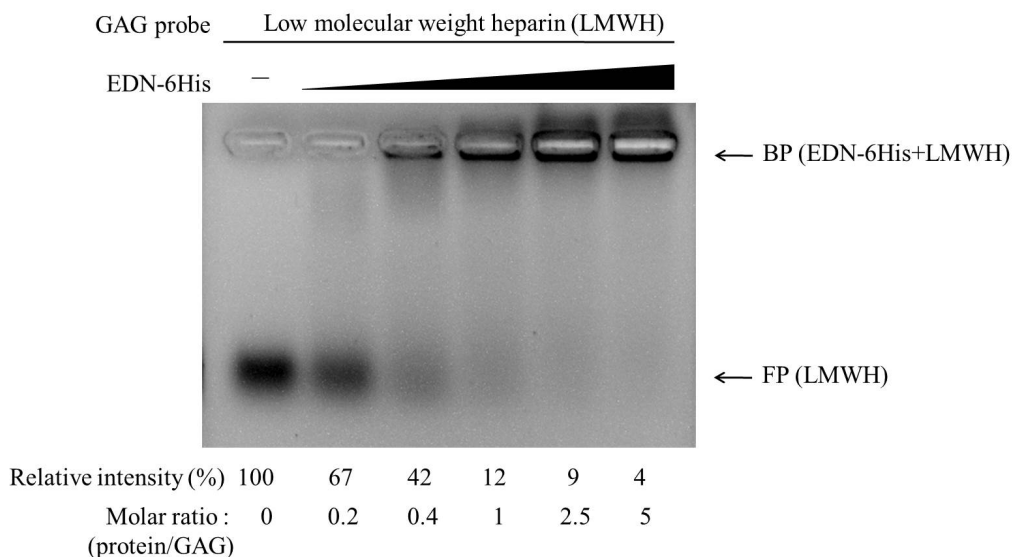

© 2013 by the authors; licensee MDPI, Basel, Switzerland. This article is an open access article distributed under the terms and conditions of the Creative Commons Attribution license (<http://creativecommons.org/licenses/by/3.0/>).
